# Supplementary material for: Enhanced photocatalysis for water splitting in layered tin chalcogenides with high carrier mobility
Source: Royal Society of Chemistry journal article supplement (doi:10.1039/c9cp00088g), 2019-01-01
Supplement: c9cp00088g1.pdf [file c9cp00088g1.pdf]

## Supporting information

### Enhanced photocatalysis for water splitting in layered tin chalcogenides with high carrier mobility

Xiaoteng Li,<sup>1</sup> Xi Zuo,<sup>1</sup> Xinxin Jiang,<sup>1</sup> Dongmei Li,<sup>1</sup> Bin Cui<sup>1,\*</sup> and Desheng Liu<sup>1,2,\*</sup>

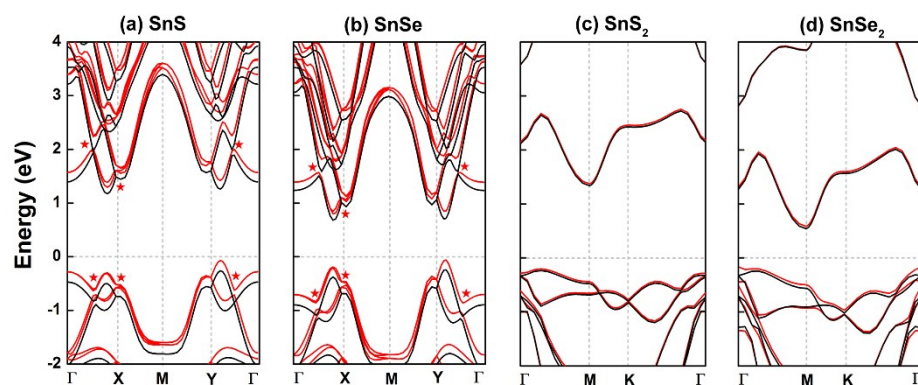

Fig.S1. DFT bandstructure of single-layered SnX and SnX<sub>2</sub> with (red lines) and without SOC (black lines). The red stars represent band splitting on some  $k$  points.

<sup>1</sup> School of Physics, State Key Laboratory of Crystal Materials, Shandong University, Jinan 250100, People's Republic of China.  
E-mail: cui bin@sdu.edu.cn; liuds@sdu.edu.cn.

<sup>2</sup> Department of Physics, Jining University, Qufu 273155, People's Republic of China
